# Supplementary material
Source: PubMed Central journal article supplement (PMC1462728)

## Supplemental Figure

**Figure S1.** TubA is a potent antiproliferative agent.

Mean bar graphs for GI<sub>50</sub> and TGI of tubA in the NCI 60-human cancer cell lines. The asterisk (\*\*\*) represents overexpression of Pgp in corresponding cell lines as measured by rhodamine efflux pattern.

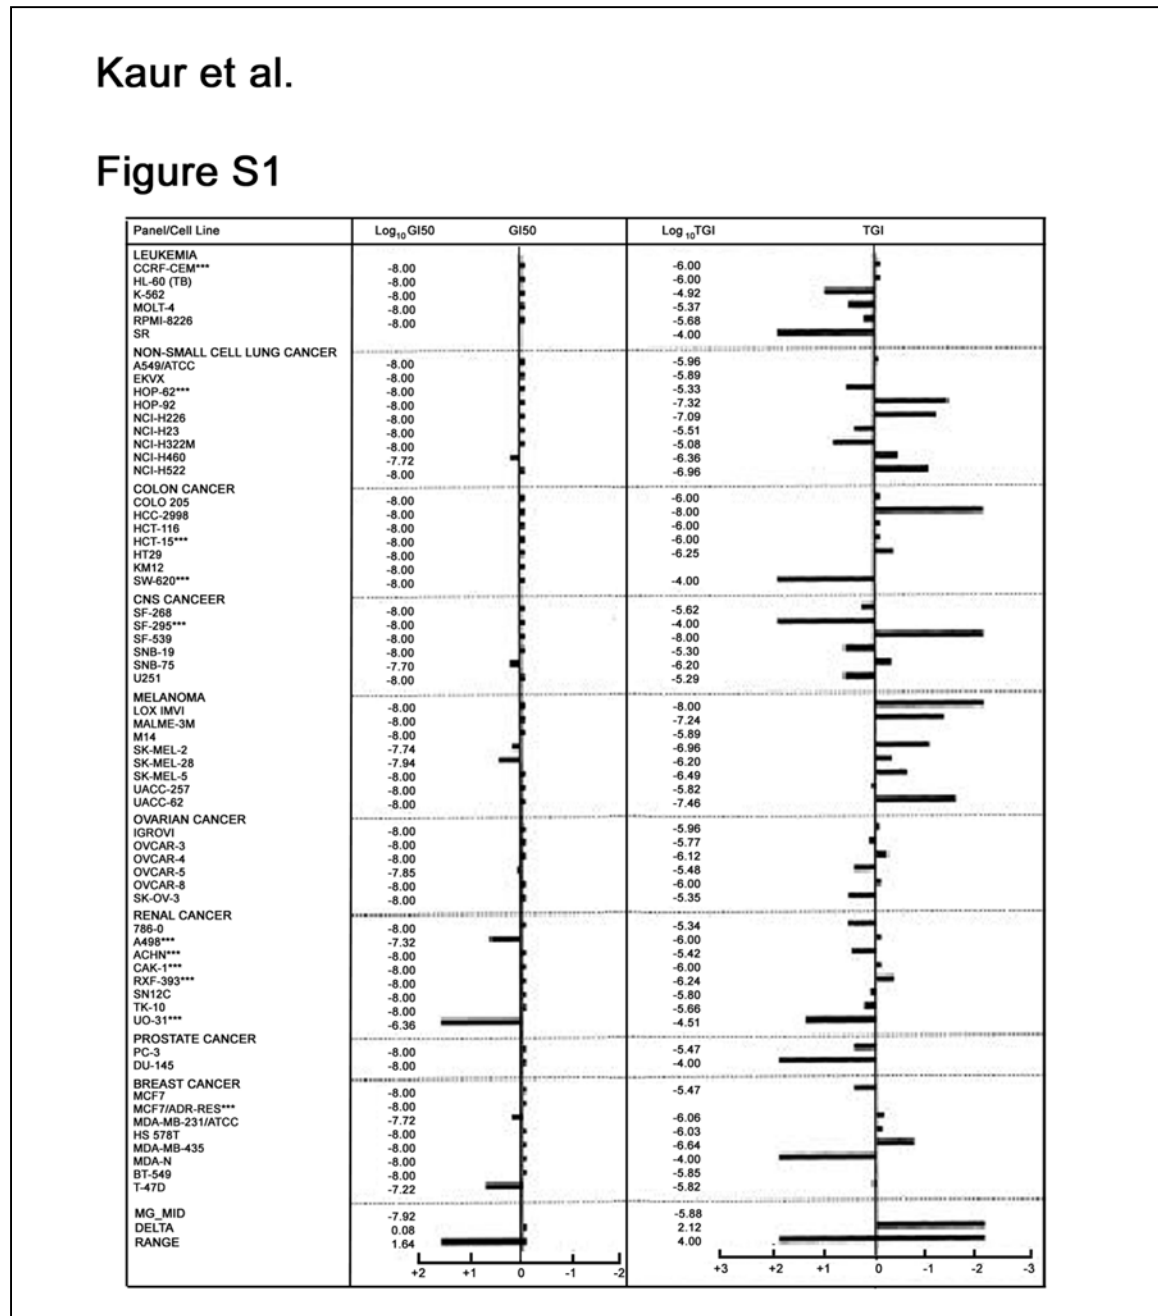

Supplement: bj3960235add.pdf [file bj3960235add.pdf]
